# Supplementary material for: Synthesis and biological investigations of tetrakis(p-carboranylthio-tetrafluorophenyl)chlorin (TPFC)
Source: Royal Society of Chemistry journal article supplement (doi:10.1039/b807836j), 2008-01-01
Supplement: b807836j.pdf [file b807836j.pdf]

## Supporting Information

### Synthesis and Cellular Investigations of Tetrakis(*p*-carboranylthio-tetrafluorophenyl)chlorin (TPFC)

Erhong Hao,<sup>a</sup> Elisabetta Friso,<sup>b</sup> Gianni Miotto,<sup>b</sup> Giulio Jori,<sup>\*b</sup> Martha Sibrian-Vazquez<sup>a</sup> and M. Graça H. Vicente<sup>\*a</sup>

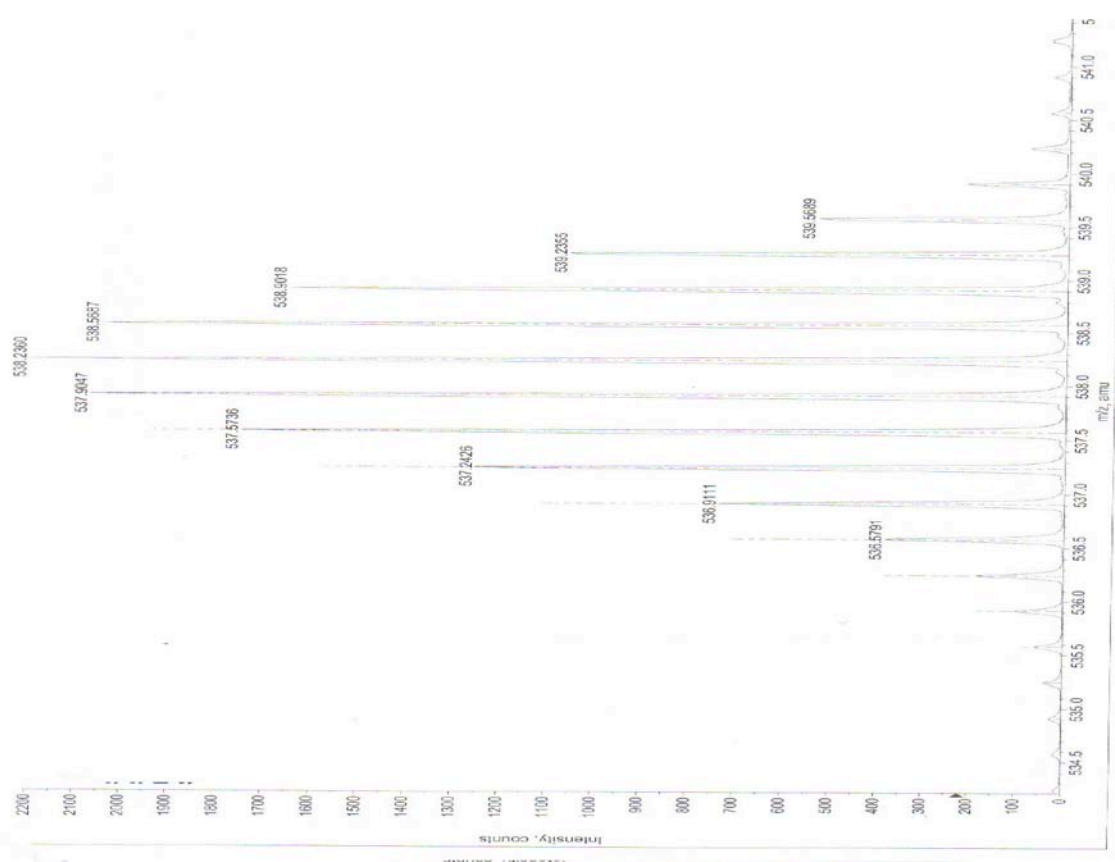

**Figure S1:** HRMS (ESI) for TPFC. Experimental (solid line); calculated (dotted line).
